# Supplementary material for: Hair Transplantation in the United States: A Population-based Survey of Female and Male Pattern Baldness
Source: PubMed Central journal article supplement — Plast Reconstr Surg Glob Open. 2023 Nov 13;11(11):e5386. doi: 10.1097/GOX.0000000000005386 (PMC10642908; doi:10.1097/gox.0000000000005386), 2023-11-13
Supplement: gox-11-e5386-s001.pdf [file gox-11-e5386-s001.pdf]

**Supplementary Material 1.** Blank questionnaire.

My biological Gender is

Male

Female

My Age

I have people in my close circle of acquaintances, who have undergone hair transplantation

Yes

No

I know people from social media, who have undergone hair transplantation surgery

Yes

No

My value on the Ludwig (Attachment 1) / Norwood Scale (Attachment 2)

Female participants should please classify their hair situation according to the Ludwig Scale. Male participants are kindly asked to evaluate their hair situation using the Norwood Scale. Please choose a definite value.

*The participants are shown five before/after pictures.*

|                                                                                         | I disagree               | I rather disagree        | I rather agree           | I agree                  |
|-----------------------------------------------------------------------------------------|--------------------------|--------------------------|--------------------------|--------------------------|
| I think that the hair transplants of the women and men were successful                  | <input type="checkbox"/> | <input type="checkbox"/> | <input type="checkbox"/> | <input type="checkbox"/> |
| I would consider myself more attractive after a hair transplant with comparable success | <input type="checkbox"/> | <input type="checkbox"/> | <input type="checkbox"/> | <input type="checkbox"/> |
| I would be happy after a hair transplant with such before/after results on myself       | <input type="checkbox"/> | <input type="checkbox"/> | <input type="checkbox"/> | <input type="checkbox"/> |

|                                                                        | I disagree               | I rather disagree        | I rather agree           | I agree                  |
|------------------------------------------------------------------------|--------------------------|--------------------------|--------------------------|--------------------------|
| I am satisfied with my current hair status                             | <input type="checkbox"/> | <input type="checkbox"/> | <input type="checkbox"/> | <input type="checkbox"/> |
| Even with my hairloss progressing, I would continue to feel attractive | <input type="checkbox"/> | <input type="checkbox"/> | <input type="checkbox"/> | <input type="checkbox"/> |

Main Questions:

|                                                                                |                          |                          |                          |                          |
|--------------------------------------------------------------------------------|--------------------------|--------------------------|--------------------------|--------------------------|
| Even with my hairloss progressing, I would feel the same self confidence       | <input type="checkbox"/> | <input type="checkbox"/> | <input type="checkbox"/> | <input type="checkbox"/> |
| I have often thought about how I would look like with full hair                | <input type="checkbox"/> | <input type="checkbox"/> | <input type="checkbox"/> | <input type="checkbox"/> |
| I have often thought about how I would look like with a completely bald head   | <input type="checkbox"/> | <input type="checkbox"/> | <input type="checkbox"/> | <input type="checkbox"/> |
| I think that a hair transplant would considerably improve my visual appearance | <input type="checkbox"/> | <input type="checkbox"/> | <input type="checkbox"/> | <input type="checkbox"/> |
| The thought of having even less hair or none at all weighs on me               | <input type="checkbox"/> | <input type="checkbox"/> | <input type="checkbox"/> | <input type="checkbox"/> |
| I think that I would have more success in dating with full hair                | <input type="checkbox"/> | <input type="checkbox"/> | <input type="checkbox"/> | <input type="checkbox"/> |

I think that I would have better success in my job with full hair

I would consider undergoing hair transplant

If so, I would be willing to spend: \_\_\_\_\_  
(\$)

If not, what is the main reason that would stop me
