# Supplementary material for: Hair Transplantation in the United States: A Population-based Survey of Female and Male Pattern Baldness
Source: PubMed Central journal article supplement — Plast Reconstr Surg Glob Open. 2023 Nov 13;11(11):e5386. doi: 10.1097/GOX.0000000000005386 (PMC10642908; doi:10.1097/gox.0000000000005386), 2023-11-13
Supplement: gox-11-e5386-s002.pdf [file gox-11-e5386-s002.pdf]

| Survey Item                                                                             | Response Choice         |                                 |                               |                   |
|-----------------------------------------------------------------------------------------|-------------------------|---------------------------------|-------------------------------|-------------------|
|                                                                                         | Yes, n (%)              | No, n (%)                       |                               |                   |
| I have people in my close circle of acquaintances, who have undergone hair transplant   | 673 (67)                | 327 (33)                        |                               |                   |
| I know people from social media, who have undergone hair transplant                     | 661 (66)                | 339 (34)                        |                               |                   |
|                                                                                         | I agree, n (%)          | I rather agree, n (%)           | I rather disagree, n (%)      | I disagree, n (%) |
| I think that the hair transplants of the men's and women's hair were successful         | 497 (50)                | 428 (43)                        | 52 (5.2)                      | 23 (2.3)          |
| I would consider myself more attractive after a hair transplant with comparable success | 599 (60)                | 333 (33)                        | 55 (5.5)                      | 13 (1.3)          |
| I would be happy after a hair transplant with such before/after results on myself       | 663 (66)                | 279 (28)                        | 45 (4.5)                      | 13 (1.3)          |
| I am satisfied with my current hair status                                              | 366 (37)                | 60 (6.0)                        | 513 (51)                      | 61 (6.1)          |
| Even with my hair loss progressing, I would continue to feel attractive                 | 161 (16)                | 435 (44)                        | 79 (7.9)                      | 334 (33)          |
| Even with the hair loss progressing, I would feel the same self confidence              | 152 (15)                | 273 (27)                        | 171 (17)                      | 404 (40)          |
| I have often thought about how I would look like with full hair                         | 323 (32)                | 372 (37)                        | 124 (12)                      | 181 (18)          |
| I have often thought about how I would look like with a completely bald head            | 462 (46)                | 233 (23)                        | 184 (18)                      | 121 (12)          |
| I think that a hair transplant would considerably improve my visual appearance          | 465 (46)                | 351 (35)                        | 94 (9.4)                      | 90 (9.0)          |
| The thought of having even less hair or none at all weighs on me                        | 462 (46)                | 265 (26)                        | 61 (6.1)                      | 212 (21)          |
| With a full head of hair, I think I would have more success in dating                   | 293 (29)                | 432 (43)                        | 31 (3.1)                      | 244 (24)          |
| With a full head of hair, I think I would have better success in my job                 | 273 (27)                | 393 (39)                        | 92 (9.2)                      | 242 (24)          |
| I would consider undergoing hair transplant                                             | 362 (36)                | 515 (52)                        | 62 (6.2)                      | 61 (6.1)          |
|                                                                                         | No personal need, n (%) | Financial Considerations, n (%) | Medical Considerations, n (%) | Others, n (%)     |
| If not, what is the main reason that would stop me                                      | 48 (4.8)                | 42 (4.2)                        | 30 (3.0)                      | 3 (0.3)           |
