# Supplementary material for: Hair Transplantation in the United States: A Population-based Survey of Female and Male Pattern Baldness
Source: PubMed Central journal article supplement — Plast Reconstr Surg Glob Open. 2023 Nov 13;11(11):e5386. doi: 10.1097/GOX.0000000000005386 (PMC10642908; doi:10.1097/gox.0000000000005386), 2023-11-13
Supplement: gox-11-e5386-s003.pdf [file gox-11-e5386-s003.pdf]

| Survey Item                                                                             | Response Choice          | Female             |                  | Male               |                  |
|-----------------------------------------------------------------------------------------|--------------------------|--------------------|------------------|--------------------|------------------|
|                                                                                         |                          | No/light hair loss | Severe hair loss | No/light hair loss | Severe hair loss |
| I think that the hair transplants of the men's and women's hair were successful         | I agree                  | 108 (40%)          | 98 (43%)         | 75 (45%)           | 220 (66%)        |
|                                                                                         | I rather agree           | 137 (50%)          | 115 (50%)        | 70 (42%)           | 95 (28%)         |
|                                                                                         | I rather disagree        | 14 (5.1%)          | 11 (4.8%)        | 13 (7.9%)          | 14 (4.1%)        |
|                                                                                         | I disagree               | 13 (4.8%)          | 4 (1.8%)         | 7 (4.2%)           | 6 (1.8%)         |
| I would consider myself more attractive after a hair transplant with comparable success | I agree                  | 177 (65%)          | 141 (62%)        | 92 (56%)           | 190 (57%)        |
|                                                                                         | I rather agree           | 84 (31%)           | 76 (33%)         | 54 (33%)           | 119 (36%)        |
|                                                                                         | I rather disagree        | 9 (3.3%)           | 9 (4.0%)         | 15 (9%)            | 22 (6.6%)        |
|                                                                                         | I disagree               | 2 (0.7%)           | 2 (0.9%)         | 4 (2.4%)           | 4 (1.2%)         |
| I would be happy after a hair transplant with such before/after results on myself       | I agree                  | 197 (72%)          | 169 (74%)        | 105 (64%)          | 212 (63%)        |
|                                                                                         | I rather agree           | 64 (23%)           | 49 (22%)         | 45 (27%)           | 111 (33%)        |
|                                                                                         | I rather disagree        | 7 (2.6%)           | 9 (4.0%)         | 10 (6.1%)          | 9 (2.7%)         |
|                                                                                         | I disagree               | 4 (1.5%)           | 1 (0.4%)         | 5 (3.3%)           | 3 (0.9%)         |
| I am satisfied with my current hair status                                              | I agree                  | 85 (31%)           | 98 (43%)         | 65 (39%)           | 119 (36%)        |
|                                                                                         | I rather agree           | 5 (1.8%)           | 27 (12%)         | 11 (6.7%)          | 20 (6.0%)        |
|                                                                                         | I rather disagree        | 174 (64%)          | 84 (37%)         | 86 (52%)           | 171 (51%)        |
|                                                                                         | I disagree               | 8 (2.9%)           | 19 (8%)          | 3 (1.8%)           | 15 (4.5%)        |
| Even with my hairloss progressing, I would continue to feel attractive                  | I agree                  | 29 (11%)           | 46 (20%)         | 21 (13%)           | 54 (16%)         |
|                                                                                         | I rather agree           | 128 (47%)          | 89 (39%)         | 73 (44%)           | 136 (41%)        |
|                                                                                         | I rather disagree        | 18 (6.6%)          | 23 (10%)         | 16 (9.7%)          | 20 (6.0%)        |
|                                                                                         | I disagree               | 97 (36%)           | 70 (31%)         | 55 (33%)           | 112 (33%)        |
| Even with the hairloss progressing, I would feel the same self confidence               | I agree                  | 34 (13%)           | 39 (17%)         | 29 (18%)           | 53 (16%)         |
|                                                                                         | I rather agree           | 76 (28%)           | 66 (29%)         | 42 (25%)           | 89 (27%)         |
|                                                                                         | I rather disagree        | 41 (63%)           | 44 (19%)         | 26 (16%)           | 64 (19%)         |
|                                                                                         | I disagree               | 121 (44%)          | 79 (35%)         | 68 (41%)           | 129 (39%)        |
| I have often thought about how I would look like with full hair                         | I agree                  | 96 (35%)           | 59 (26%)         | 53 (32%)           | 124 (37%)        |
|                                                                                         | I rather agree           | 104 (38%)          | 74 (32%)         | 74 (45%)           | 120 (36%)        |
|                                                                                         | I rather disagree        | 10 (3.7%)          | 60 (26%)         | 14 (8.5%)          | 39 (12%)         |
|                                                                                         | I disagree               | 62 (23%)           | 35 (15%)         | 24 (15%)           | 62 (19%)         |
| I have often thought about how I would look like with a completely bald head            | I agree                  | 137 (50%)          | 93 (41%)         | 80 (48%)           | 158 (47%)        |
|                                                                                         | I rather agree           | 65 (24%)           | 42 (18%)         | 39 (24%)           | 79 (24%)         |
|                                                                                         | I rather disagree        | 42 (15%)           | 58 (25%)         | 27 (16%)           | 57 (17%)         |
|                                                                                         | I disagree               | 28 (10%)           | 35 (15%)         | 19 (12%)           | 41 (12%)         |
| I think that a hair transplant would considerably improve my visual appearance          | I agree                  | 130 (48%)          | 99 (43%)         | 81 (49%)           | 165 (49%)        |
|                                                                                         | I rather agree           | 102 (38%)          | 70 (31%)         | 56 (34%)           | 111 (33%)        |
|                                                                                         | I rather disagree        | 13 (4.8%)          | 41 (18%)         | 10 (6.1%)          | 30 (9.0%)        |
|                                                                                         | I disagree               | 27 (9.9%)          | 18 (7.9%)        | 18 (11%)           | 29 (8.7%)        |
| The thought of having even less hair or none at all weighs on me                        | I agree                  | 134 (49%)          | 90 (39%)         | 88 (53%)           | 165 (49%)        |
|                                                                                         | I rather agree           | 81 (30%)           | 50 (22%)         | 38 (23%)           | 81 (24%)         |
|                                                                                         | I rather disagree        | 8 (2.9%)           | 24 (11%)         | 8 (4.8%)           | 21 (6.3%)        |
|                                                                                         | I disagree               | 49 (18%)           | 64 (28%)         | 31 (19%)           | 68 (20%)         |
| With a full head of hair, I think I would have more success in dating                   | I agree                  | 85 (31%)           | 66 (29%)         | 45 (27%)           | 105 (31%)        |
|                                                                                         | I rather agree           | 131 (48%)          | 69 (30%)         | 82 (50%)           | 139 (41%)        |
|                                                                                         | I rather disagree        | 0 (0%)             | 19 (8.3%)        | 3 (1.8%)           | 11 (3.3%)        |
|                                                                                         | I disagree               | 56 (21%)           | 74 (32%)         | 35 (21%)           | 80 (24%)         |
| With a full head of hair, I think I would have better success in my job                 | I agree                  | 74 (27%)           | 61 (27%)         | 47 (28%)           | 91 (27%)         |
|                                                                                         | I rather agree           | 120 (44%)          | 72 (32%)         | 73 (44%)           | 127 (38%)        |
|                                                                                         | I rather disagree        | 19 (7.0%)          | 29 (13%)         | 11 (6.7%)          | 34 (10%)         |
|                                                                                         | I disagree               | 59 (22%)           | 66 (29%)         | 34 (21%)           | 83 (25%)         |
| I would consider undergoing hair transplant                                             | I agree                  | 120 (44%)          | 72 (32%)         | 64 (39%)           | 133 (40%)        |
|                                                                                         | I rather agree           | 151 (56%)          | 103 (45%)        | 91 (55%)           | 171 (51%)        |
|                                                                                         | I rather disagree        | 0 (0%)             | 19 (8%)          | 3 (1.8%)           | 11 (3.3%)        |
|                                                                                         | I disagree               | 1 (0.4%)           | 34 (15%)         | 7 (4.2%)           | 19 (5.7%)        |
| If not, what is the main reason that would stop me                                      | No personal need         | 0 (0%)             | 7 (13%)          | 3 (30%)            | 6 (30%)          |
|                                                                                         | Financial Considerations | 0 (0%)             | 29 (55%)         | 5 (50%)            | 9 (45%)          |
|                                                                                         | Medical Considerations   | 1 (100%)           | 14 (26%)         | 2 (20%)            | 2 (10%)          |
|                                                                                         | Others                   | 0 (0%)             | 3 (6%)           | 1 (10%)            | 3 (15%)          |
